# Supplementary material for: Epidemiology and Survival of Patients with Spinal Ependymomas: A Large Retrospective Cohort Study
Source: Research Square preprint supplement (doi:10.21203/rs.3.rs-7957550/v1), 2025-11-10
Supplement: Supplementary file 1 [file 3ec6d882a6e2a87e0877836a.docx]

Table -1 The baseline demographic and clinicopathologic characteristics of the overall survival related variables of spinal ependymomas

|  |  | train | | valid | | Total | |
| --- | --- | --- | --- | --- | --- | --- | --- |
| Variables |  | Frequency | Percentage | Frequency | Percentage | Frequency | Percentage |
| Sex | Female | 1071 | 48.13 | 440 | 46.12 | 1511 | 47.53 |
|  | Male | 1154 | 51.87 | 514 | 53.88 | 1668 | 52.47 |
| Year | 2000-2006 | 579 | 26.02 | 230 | 24.11 | 809 | 25.45 |
|  | 2007-2013 | 815 | 36.63 | 382 | 40.04 | 1197 | 37.65 |
|  | 2014-2020 | 831 | 37.35 | 342 | 35.85 | 1173 | 36.90 |
| Race | Black | 133 | 5.98 | 58 | 6.08 | 191 | 6.01 |
|  | Others | 192 | 8.63 | 71 | 7.44 | 263 | 8.27 |
|  | White | 1900 | 85.39 | 825 | 86.48 | 2725 | 85.72 |
| Income | I | 89 | 4.00 | 45 | 4.72 | 134 | 4.22 |
|  | II | 568 | 25.53 | 221 | 23.17 | 789 | 24.82 |
|  | III | 1568 | 70.47 | 688 | 72.12 | 2256 | 70.97 |
| Marital | Married | 1186 | 53.30 | 507 | 53.14 | 1693 | 53.26 |
|  | Unmarried | 1039 | 46.70 | 447 | 46.86 | 1486 | 46.74 |
| size | unknown | 1446 | 64.99 | 616 | 64.57 | 2062 | 64.86 |
|  | ≤2.5 | 414 | 18.61 | 180 | 18.87 | 594 | 18.69 |
|  | ＞2.5 | 365 | 16.40 | 158 | 16.56 | 523 | 16.45 |
| behav | WHO I | 893 | 40.13 | 413 | 43.29 | 1306 | 41.08 |
|  | WHO II | 1275 | 57.30 | 510 | 53.46 | 1785 | 56.15 |
|  | WHO III | 57 | 2.56 | 31 | 3.25 | 88 | 2.77 |
| timetotreat | NAN | 167 | 7.51 | 76 | 7.97 | 243 | 7.64 |
|  | ≤1 | 1757 | 78.97 | 749 | 78.51 | 2506 | 78.83 |
|  | ＞1 | 301 | 13.53 | 129 | 13.52 | 430 | 13.53 |
| Radiation | Administered | 369 | 16.58 | 150 | 15.72 | 519 | 16.33 |
|  | NO | 1856 | 83.42 | 804 | 84.28 | 2660 | 83.67 |
| Chemotherapy | NO | 2214 | 99.51 | 943 | 98.85 | 3157 | 99.31 |
|  | Yes | 11 | 0.49 | 11 | 1.15 | 22 | 0.69 |
| surgery | NO | 192 | 8.63 | 96 | 10.06 | 288 | 9.06 |
|  | YES | 2033 | 91.37 | 858 | 89.94 | 2891 | 90.94 |
