# Supplementary material for: Epidemiology and Survival of Patients with Spinal Ependymomas: A Large Retrospective Cohort Study
Source: Research Square preprint supplement (doi:10.21203/rs.3.rs-7957550/v1), 2025-11-10
Supplement: Supplementary file 2 [file f27b707527a3ee7c18630f75.docx]

Table 2

The univariate and multivariate Cox regression analyses of the Overall Survival related variables of spinal ependymomas

| **Variable** | **Subgroup** | **Univariate_HR_95CI** | **Univariate_Cox_p** | **Multivariate_HR_95CI** | **Multivariate_Cox_p** |
| --- | --- | --- | --- | --- | --- |
| Sex | Female (Reference) | 1 (1-1) |  | 1.00 (Reference) | <> |
|  | Male | 1.15 (0.9-1.47) | 0.25028 | 1.26 (0.98-1.62) | 0.06582 |
| Year | 2000-2006 (Reference) | 1 (1-1) |  | 1.00 (Reference) | <> |
|  | 2007-2013 | 0.95 (0.71-1.26) | 0.70901 | 0.91 (0.68-1.23) | 0.53821 |
|  | 2014-2020 | 0.9 (0.59-1.37) | 0.61316 | 0.9 (0.59-1.38) | 0.63124 |
| Race | Black (Reference) | 1 (1-1) |  | 1.00 (Reference) | <> |
|  | Others | 0.44 (0.21-0.91) | 0.02673 | 0.48 (0.23-1) | 0.05134 |
|  | White | 0.85 (0.54-1.34) | 0.47659 | 0.86 (0.54-1.37) | 0.51633 |
| Income | I (Reference) | 1 (1-1) |  | 1.00 (Reference) | <> |
|  | II | 0.63 (0.35-1.12) | 0.11324 | 0.6 (0.33-1.07) | 0.08586 |
|  | III | 0.58 (0.34-1) | 0.05027 | 0.56 (0.32-0.99) | 0.04436 |
| Marital | Married (Reference) | 1 (1-1) |  | 1.00 (Reference) | <> |
|  | Unmarried | 1.1 (0.86-1.4) | 0.43987 | 1.03 (0.8-1.33) | 0.79637 |
| size | >2.5 (Reference) | 1 (1-1) |  | 1.00 (Reference) | <> |
|  | ≤2.5 | 1.07 (0.72-1.6) | 0.73853 | 1.2 (0.79-1.82) | 0.40329 |
|  | unknown | 1.09 (0.78-1.53) | 0.62679 | 1.08 (0.76-1.54) | 0.67514 |
| behav | WHO I (Reference) | 1 (1-1) |  | 1.00 (Reference) | <> |
|  | WHO II | 1.48 (1.11-1.97) | 0.00710 | 1.45 (1.07-1.95) | 0.01546 |
|  | WHO III | 5.79 (3.51-9.56) | < 0.001 | 4.12 (2.28-7.46) | < 0.001 |
| timetotreat | >1 (Reference) | 1 (1-1) |  | 1.00 (Reference) | <> |
|  | ≤1 | 1.24 (0.81-1.89) | 0.32184 | 1.23 (0.81-1.91) | 0.35137 |
|  | N | 1.54 (0.86-2.74) | 0.14494 | 0.94 (0.45-1.93) | 0.82364 |
| Radiation | Administered (Reference) | 1 (1-1) |  | 1.00 (Reference) | <> |
|  | NO | 0.68 (0.51-0.91) | 0.00883 | 0.79 (0.58-1.08) | 0.14240 |
| Chemotherapy | NO (Reference) | 1 (1-1) |  | 1.00 (Reference) | <> |
|  | Yes | 10.03 (4.72-21.29) | < 0.001 | 4.13 (1.69-10.07) | 0.00185 |
| surgery | NO (Reference) | 1 (1-1) |  | 1.00 (Reference) | <> |
|  | YES | 0.6 (0.41-0.86) | 0.00611 | 0.5 (0.29-0.87) | 0.01312 |

HR, hazard ratio
