# Supplementary material for: Epidemiology and Survival of Patients with Spinal Ependymomas: A Large Retrospective Cohort Study
Source: Research Square preprint supplement (doi:10.21203/rs.3.rs-7957550/v1), 2025-11-10
Supplement: Supplementary file 3 [file f62dd358a2673ccd33b878e3.docx]

Table 3 The detailed scores of independent risk predictors of patients with spinal ependymomas .

| **Variable** | **Level** | **Points** |
| --- | --- | --- |
| Sex | Female | 0 |
|  | Male | 19 |
| Race | Black | 45 |
|  | Others | 0 |
|  | White | 20 |
| Age | Ⅰ | 0 |
|  | Ⅱ | 12 |
|  | Ⅲ | 100 |
| Behavior | WHO Ⅰ | 0 |
|  | WHO Ⅱ | 13 |
|  | WHO Ⅲ | 67 |
| Radiation | Administered | 20 |
|  | NO | 0 |
| Surgery | NO | 25 |
|  | YES | 0 |
| Chemotherapy | NO | 0 |
|  | YES | 90 |
